# Supplementary material
Source: publisher figshare collection journal article supplement (https://acs.figshare.com/ndownloader/files/3585717)
Supplement: Supplementary file 1 [file 3585717]

data_bra_dmso_1
 # SUBMISSION DETAILS
_publ_contact_author_name             'Doris E. Braun'
_publ_contact_author_address
;
Department of Chemistry
University College London
20 Gordon Street
London WC1H 0AJ
United Kingdom
;
_publ_contact_author_phone            '44 (0)20 7679 4622'
_publ_contact_author_fax              '44 (0)20 7679 7463'
_publ_contact_author_email            's.l.price@ucl.ac.uk'
_publ_requested_journal               'Crystal Growth & Design'

# TITLE AND AUTHOR LIST

_publ_section_title
;
Solid state forms of beta-Resorcylic Acid: 
How Exhaustive should a Polymorph Screen be?
;
loop_
_publ_author_name
_publ_author_address
'Doris E. Braun'
;
Department of Chemistry
University College London
20 Gordon Street
London WC1H 0AJ
United Kingdom
;
'Panagiotis G.Karamertzanis'
;
Centre for Process Systems Engineering
Department of chemical Engineering
Imperial College London
Lodon SW7 2AZ
United Kingdom
;
'Jean-Baptiste Arlin'
;
University of Strathclyde
Strathclyde Institute of Pharmacy and Biomedical Sciences
27 Taylor Street
Glasgow G4 0NR
United Kingdom
;
'Alastair J. Florence'
;
University of Strathclyde
Strathclyde Institute of Pharmacy and Biomedical Sciences
27 Taylor Street
Glasgow G4 0NR
United Kingdom
;
'Volker Kahlenberg'
;
Institute of Mineralogy and Petrography
University of Innsbruck
Innrain 52
6020 Innsbruck
Austria
;
'Derek A. Tocher'
;
Department of Chemistry
University College London
20 Gordon Street
London WC1H 0AJ
United Kingdom
;
'Ulrich J. Griesser'
;
Institute of Pharmacy
University of Innsbruck
Innrain 52
6020 Innsbruck
Austria
;
'Sarah L. Price'
;
Department of Chemistry
University College London
20 Gordon Street
London WC1H 0AJ
United Kingdom
;

#\#CIF_1.1
 
#  CIF produced by WinGX routine CIF_UPDATE
#  Created on 2010-05-27 at 10:39:19
#  Using CIFtbx version 2.6.2 16 Jun 1998
 
#  Dictionary name : cif_core.dic
#  Dictionary vers : 2.3
#  Request file    : c:\wingx\files\archive.dat
#  CIF files read  : bra_dmso_1 bra_dmso_archive

 
_audit_creation_date                    2010-05-27T10:39:19-00:00
_audit_creation_method                  'WinGX routine CIF_UPDATE'
_audit_conform_dict_name                cif_core.dic
_audit_conform_dict_version             2.3
_audit_conform_dict_location            ftp://ftp.iucr.org/pub/cif_core.dic
_publ_requested_category                FO
 
#----------------------------------------------------------------------------#
#                   CHEMICAL INFORMATION                                     #
#----------------------------------------------------------------------------#
 
_chemical_name_systematic  '2,4-hidyroxybenzoic acid DMSO hemisolvate'
_chemical_name_common             'beta resoryclic DMSO hemisolvate'
_chemical_formula_moiety                '2(C7 H6 O4), C2 H6 O S'
_chemical_formula_sum                   'C16 H18 O9 S'
_chemical_formula_weight                386.36
 
#----------------------------------------------------------------------------#
#                   UNIT CELL INFORMATION                                    #
#----------------------------------------------------------------------------#
 
_symmetry_cell_setting                  orthorhombic
_symmetry_space_group_name_H-M          'P 21 21 21'
_symmetry_space_group_name_Hall         'P 2ac 2ab'
loop_
    _symmetry_equiv_pos_as_xyz
'x, y, z'
'-x+1/2, -y, z+1/2'
'x+1/2, -y+1/2, -z'
'-x, y+1/2, -z+1/2'
 
_cell_length_a                          6.39832(12)
_cell_length_b                          11.7099(3)
_cell_length_c                          23.2362(5)
_cell_angle_alpha                       90
_cell_angle_beta                        90
_cell_angle_gamma                       90
_cell_volume                            1740.94(7)
_cell_formula_units_Z                   4
_cell_measurement_temperature           173(2)
_cell_measurement_reflns_used           6563
_cell_measurement_theta_min             3.1494
_cell_measurement_theta_max             28.464
 
#----------------------------------------------------------------------------#
#                   CRYSTAL INFORMATION                                      #
#----------------------------------------------------------------------------#
 
_exptl_crystal_description              fragment
_exptl_crystal_colour                   colourless
_exptl_crystal_size_max                 0.4
_exptl_crystal_size_mid                 0.32
_exptl_crystal_size_min                 0.3
_exptl_crystal_density_diffrn           1.474
_exptl_crystal_density_method           'not measured'
_exptl_crystal_F_000                    808
_exptl_special_details
;
 ?
;
 
#----------------------------------------------------------------------------#
#                   ABSORPTION CORRECTION                                    #
#----------------------------------------------------------------------------#
 
_exptl_absorpt_coefficient_mu           0.234
_exptl_absorpt_correction_type          multi-scan
_exptl_absorpt_process_details
;
        CrysAlis RED, Oxford Diffraction Ltd.,
        Version 1.171.32.24 (release 21-04-2008 CrysAlis171 .NET)
        (compiled Apr 21 2008,18:23:10)
        Empirical absorption correction using spherical harmonics,
 implemented in SCALE3 ABSPACK scaling algorithm.
;
_exptl_absorpt_correction_T_min         0.8779
_exptl_absorpt_correction_T_max         0.93
 
#----------------------------------------------------------------------------#
#                   DATA COLLECTION                                          #
#----------------------------------------------------------------------------#
 
_diffrn_ambient_temperature             173(2)
_diffrn_radiation_wavelength            0.71073
_diffrn_radiation_type                  MoK\a
_diffrn_radiation_monochromator         graphite
_diffrn_detector_area_resol_mean        10.3822
_diffrn_orient_matrix_ub_11             -0.0082428086
_diffrn_orient_matrix_ub_12             0.0194012496
_diffrn_orient_matrix_ub_13             -0.0288132714
_diffrn_orient_matrix_ub_21             -0.0061561137
_diffrn_orient_matrix_ub_22             -0.0573519272
_diffrn_orient_matrix_ub_23             -0.009657181
_diffrn_orient_matrix_ub_31             -0.110402888
_diffrn_orient_matrix_ub_32             0.0017515071
_diffrn_orient_matrix_ub_33             0.0026989795
_diffrn_measurement_device_type         'Oxford diffraction GEMINI R ULTRA'
_diffrn_measurement_method              '\w scans'
_diffrn_reflns_av_R_equivalents         0.032
_diffrn_reflns_av_unetI/netI            0.0337
_diffrn_reflns_number                   11590
_diffrn_reflns_limit_h_min              -7
_diffrn_reflns_limit_h_max              7
_diffrn_reflns_limit_k_min              -12
_diffrn_reflns_limit_k_max              14
_diffrn_reflns_limit_l_min              -28
_diffrn_reflns_limit_l_max              23
_diffrn_reflns_theta_min                3.15
_diffrn_reflns_theta_max                25.99
_diffrn_reflns_theta_full               25.99
_diffrn_measured_fraction_theta_full
                                        0.996
_diffrn_measured_fraction_theta_max
                                        0.996
_reflns_number_total                    3400
_reflns_number_gt                       3014
_reflns_threshold_expression            >2sigma(I)
 
#----------------------------------------------------------------------------#
#                   COMPUTER PROGRAMS USED                                   #
#----------------------------------------------------------------------------#
 
_computing_data_collection
;
        CrysAlis CCD, Oxford Diffraction Ltd.,
        Version 1.171.32.24 (release 21-04-2008 CrysAlis171 .NET)
        (compiled Apr 21 2008,18:23:10)
;
_computing_cell_refinement
;
        CrysAlis RED, Oxford Diffraction Ltd.,
        Version 1.171.32.24 (release 21-04-2008 CrysAlis171 .NET)
        (compiled Apr 21 2008,18:23:10)
;
_computing_data_reduction
;
        CrysAlis RED, Oxford Diffraction Ltd.,
        Version 1.171.32.24 (release 21-04-2008 CrysAlis171 .NET)
        (compiled Apr 21 2008,18:23:10)
;
_computing_structure_solution           'SIR2002 (Burla et al., 2002)'
_computing_structure_refinement         'SHELXL-97 (Sheldrick, 1997)'
 
#----------------------------------------------------------------------------#
#                   REFINEMENT INFORMATION                                   #
#----------------------------------------------------------------------------#
 
_refine_special_details
;
 Refinement of F^2^ against ALL reflections.  The weighted R-factor wR and
 goodness of fit S are based on F^2^, conventional R-factors R are based
 on F, with F set to zero for negative F^2^. The threshold expression of
 F^2^ > 2sigma(F^2^) is used only for calculating R-factors(gt) etc. and is
 not relevant to the choice of reflections for refinement.  R-factors based
 on F^2^ are statistically about twice as large as those based on F, and R-
 factors based on ALL data will be even larger.
 The distance between O8 and H9 was restrained with DFIX 0.82in SHELXL 
 with a standard uncertainty of 0.02.
 PLAT094_ALERT_2_C Ratio of Maximum / Minimum Residual Density 2.59: Largest 
 diff. peak and hole in proximity to solvent molecule.
;
_refine_ls_structure_factor_coef        Fsqd
_refine_ls_matrix_type                  full
_refine_ls_weighting_scheme             calc
_refine_ls_weighting_details
         'calc w=1/[\s^2^(Fo^2^)+(0.0574P)^2^+0.0000P] where P=(Fo^2^+2Fc^2^)/3'
_atom_sites_solution_primary            direct
_atom_sites_solution_secondary          difmap
_atom_sites_solution_hydrogens          geom
_refine_ls_hydrogen_treatment           mixed
_refine_ls_extinction_method            none
_refine_ls_number_reflns                3400
_refine_ls_number_parameters            261
_refine_ls_number_restraints            1
_refine_ls_R_factor_all                 0.0431
_refine_ls_R_factor_gt                  0.0367
_refine_ls_wR_factor_ref                0.0887
_refine_ls_wR_factor_gt                 0.0863
_refine_ls_goodness_of_fit_ref          1.019
_refine_ls_restrained_S_all             1.02
_refine_ls_shift/su_max                 0.004
_refine_ls_shift/su_mean                0
_refine_ls_abs_structure_details
  'Flack H D (1983), Acta Cryst. A39, 876-881'
_refine_ls_abs_structure_Flack    0.15(9)
_refine_diff_density_max                0.617
_refine_diff_density_min                -0.238
_refine_diff_density_rms                0.047
 
#----------------------------------------------------------------------------#
#                   ATOMIC TYPES, COORDINATES AND THERMAL PARAMETERS         #
#----------------------------------------------------------------------------#
 
loop_
    _atom_type_symbol
    _atom_type_description
    _atom_type_scat_dispersion_real
    _atom_type_scat_dispersion_imag
    _atom_type_scat_source
C C 0.0033 0.0016 'International Tables Vol C Tables 4.2.6.8 and 6.1.1.4'
H H 0 0 'International Tables Vol C Tables 4.2.6.8 and 6.1.1.4'
O O 0.0106 0.006 'International Tables Vol C Tables 4.2.6.8 and 6.1.1.4'
S S 0.1246 0.1234 'International Tables Vol C Tables 4.2.6.8 and 6.1.1.4'
 
loop_
    _atom_site_label
    _atom_site_type_symbol
    _atom_site_fract_x
    _atom_site_fract_y
    _atom_site_fract_z
    _atom_site_U_iso_or_equiv
    _atom_site_adp_type
    _atom_site_occupancy
    _atom_site_symmetry_multiplicity
    _atom_site_calc_flag
    _atom_site_refinement_flags
    _atom_site_disorder_assembly
    _atom_site_disorder_group
S S 0.38657(9) 0.21771(5) 0.21540(2) 0.02708(15) Uani 1 1 d . . .
O6 O -0.0974(2) 0.08137(13) 0.54965(6) 0.0262(3) Uani 1 1 d . . .
O1 O 0.5618(3) 0.10327(15) 0.48694(7) 0.0306(4) Uani 1 1 d . . .
H1 H 0.661(4) 0.098(2) 0.5037(11) 0.032(8) Uiso 1 1 d . . .
O2 O 0.6280(2) -0.07940(13) 0.46424(7) 0.0261(3) Uani 1 1 d . . .
O7 O 0.1333(3) 0.19090(13) 0.62063(7) 0.0321(4) Uani 1 1 d . . .
H8 H 0.007(5) 0.177(3) 0.5971(15) 0.069(10) Uiso 1 1 d . . .
O8 O 0.7634(3) 0.01569(15) 0.68062(8) 0.0310(4) Uani 1 1 d D . .
H9 H 0.765(4) 0.0697(18) 0.7003(11) 0.040(9) Uiso 1 1 d D . .
O4 O -0.2364(2) 0.00919(15) 0.33674(7) 0.0310(4) Uani 1 1 d . . .
H3 H -0.246(5) -0.050(3) 0.3149(15) 0.063(10) Uiso 1 1 d . . .
O3 O 0.3771(3) -0.18466(13) 0.39426(7) 0.0344(4) Uani 1 1 d . . .
H2 H 0.502(5) -0.174(3) 0.4180(14) 0.065(10) Uiso 1 1 d . . .
O5 O -0.0184(3) -0.09814(14) 0.52557(7) 0.0281(4) Uani 1 1 d . . .
H7 H -0.133(4) -0.091(2) 0.5063(11) 0.031(7) Uiso 1 1 d . . .
C7 C 0.5149(3) 0.0071(2) 0.46070(9) 0.0223(5) Uani 1 1 d . . .
C4 C -0.0543(3) 0.0056(2) 0.36668(9) 0.0225(5) Uani 1 1 d . . .
C8 C 0.2120(3) -0.00013(19) 0.58709(9) 0.0230(5) Uani 1 1 d . . .
O9 O 0.2728(2) 0.32576(14) 0.23435(7) 0.0359(4) Uani 1 1 d . . .
C13 C 0.3561(3) -0.09039(19) 0.58757(9) 0.0247(5) Uani 1 1 d . . .
H12 H 0.3265 -0.1573 0.5659 0.03 Uiso 1 1 calc R . .
C12 C 0.5382(3) -0.08471(19) 0.61833(10) 0.0255(5) Uani 1 1 d . . .
H11 H 0.6345 -0.1465 0.6176 0.031 Uiso 1 1 calc R . .
C14 C 0.0213(3) -0.0023(2) 0.55295(9) 0.0223(5) Uani 1 1 d . . .
C2 C 0.2596(3) -0.08897(18) 0.39675(9) 0.0222(5) Uani 1 1 d . . .
C9 C 0.2598(3) 0.09835(18) 0.61950(9) 0.0218(4) Uani 1 1 d . . .
C1 C 0.3202(3) 0.00771(19) 0.42806(9) 0.0217(5) Uani 1 1 d . . .
C11 C 0.5808(3) 0.01313(19) 0.65079(9) 0.0230(5) Uani 1 1 d . . .
C5 C 0.0016(3) 0.10223(19) 0.39856(10) 0.0258(5) Uani 1 1 d . . .
H5 H -0.0881 0.1668 0.3997 0.031 Uiso 1 1 calc R . .
C6 C 0.1867(3) 0.1029(2) 0.42816(9) 0.0236(5) Uani 1 1 d . . .
H6 H 0.2256 0.1692 0.4492 0.028 Uiso 1 1 calc R . .
C10 C 0.4419(3) 0.10400(19) 0.65156(10) 0.0232(5) Uani 1 1 d . . .
H10 H 0.4716 0.1699 0.674 0.028 Uiso 1 1 calc R . .
C3 C 0.0721(3) -0.08932(19) 0.36621(10) 0.0242(5) Uani 1 1 d . . .
H4 H 0.0317 -0.1552 0.3451 0.029 Uiso 1 1 calc R . .
C15 C 0.2994(4) 0.1087(2) 0.26227(12) 0.0415(6) Uani 1 1 d . . .
H15A H 0.3223 0.1323 0.3022 0.062 Uiso 1 1 calc R . .
H15B H 0.3775 0.0384 0.2546 0.062 Uiso 1 1 calc R . .
H15C H 0.15 0.0951 0.256 0.062 Uiso 1 1 calc R . .
C16 C 0.6441(3) 0.2327(2) 0.24331(11) 0.0316(5) Uani 1 1 d . . .
H16A H 0.7125 0.2983 0.2251 0.047 Uiso 1 1 calc R . .
H16B H 0.7244 0.1632 0.2352 0.047 Uiso 1 1 calc R . .
H16C H 0.6373 0.2447 0.285 0.047 Uiso 1 1 calc R . .
 
loop_
    _atom_site_aniso_label
    _atom_site_aniso_U_11
    _atom_site_aniso_U_22
    _atom_site_aniso_U_33
    _atom_site_aniso_U_23
    _atom_site_aniso_U_13
    _atom_site_aniso_U_12
S 0.0291(3) 0.0313(3) 0.0209(3) -0.0023(2) -0.0005(2) -0.0028(2)
O6 0.0249(7) 0.0283(9) 0.0255(8) -0.0017(7) -0.0025(7) -0.0009(7)
O1 0.0255(9) 0.0322(10) 0.0341(10) -0.0054(8) -0.0067(8) -0.0035(8)
O2 0.0218(7) 0.0304(9) 0.0262(8) -0.0033(7) -0.0014(7) 0.0010(7)
O7 0.0299(8) 0.0294(9) 0.0371(10) -0.0056(7) -0.0085(8) 0.0052(8)
O8 0.0258(8) 0.0331(10) 0.0342(9) -0.0011(8) -0.0068(7) 0.0028(8)
O4 0.0248(8) 0.0345(10) 0.0336(9) 0.0003(8) -0.0066(7) 0.0027(7)
O3 0.0302(8) 0.0285(9) 0.0445(10) -0.0098(7) -0.0128(8) 0.0067(8)
O5 0.0262(8) 0.0278(9) 0.0304(9) -0.0043(8) -0.0052(7) -0.0047(7)
C7 0.0223(10) 0.0248(12) 0.0199(11) -0.0028(9) 0.0065(9) -0.0086(10)
C4 0.0172(10) 0.0288(12) 0.0214(11) 0.0047(10) 0.0030(8) -0.0027(9)
C8 0.0236(10) 0.0258(12) 0.0194(10) 0.0010(9) 0.0059(9) -0.0054(10)
O9 0.0341(8) 0.0379(10) 0.0356(9) 0.0010(7) -0.0013(7) 0.0095(8)
C13 0.0287(11) 0.0216(11) 0.0238(11) 0.0004(9) 0.0053(9) -0.0048(10)
C12 0.0240(10) 0.0242(12) 0.0284(12) 0.0065(10) 0.0064(9) 0.0024(9)
C14 0.0226(10) 0.0265(12) 0.0178(11) 0.0017(10) 0.0059(9) -0.0081(10)
C2 0.0206(10) 0.0234(11) 0.0226(11) -0.0013(9) 0.0031(9) -0.0008(9)
C9 0.0206(10) 0.0225(11) 0.0222(11) 0.0019(9) 0.0044(9) 0.0004(9)
C1 0.0218(10) 0.0242(12) 0.0192(11) 0.0021(9) 0.0030(8) -0.0049(9)
C11 0.0193(10) 0.0293(12) 0.0204(11) 0.0065(9) 0.0016(9) -0.0030(9)
C5 0.0239(11) 0.0232(12) 0.0303(12) 0.0040(10) 0.0052(9) 0.0047(10)
C6 0.0277(11) 0.0219(11) 0.0212(11) -0.0006(9) 0.0061(9) -0.0044(9)
C10 0.0246(11) 0.0229(12) 0.0220(11) -0.0009(9) -0.0004(9) -0.0015(9)
C3 0.0244(11) 0.0225(11) 0.0257(12) -0.0014(9) 0.0016(9) -0.0024(9)
C15 0.0412(13) 0.0371(14) 0.0463(15) 0.0050(12) 0.0031(12) -0.0115(12)
C16 0.0260(11) 0.0344(13) 0.0342(13) -0.0062(11) 0.0015(10) -0.0006(10)
 
 
#----------------------------------------------------------------------------#
#                   MOLECULAR GEOMETRY                                       #
#----------------------------------------------------------------------------#
 
_geom_special_details
;
 All esds (except the esd in the dihedral angle between two l.s. planes)
 are estimated using the full covariance matrix.  The cell esds are taken
 into account individually in the estimation of esds in distances, angles
 and torsion angles; correlations between esds in cell parameters are only
 used when they are defined by crystal symmetry.  An approximate (isotropic)
 treatment of cell esds is used for estimating esds involving l.s. planes.
;
loop_
    _geom_bond_atom_site_label_1
    _geom_bond_atom_site_label_2
    _geom_bond_distance
    _geom_bond_site_symmetry_2
    _geom_bond_publ_flag
S O9 1.5246(17) . ?
S C15 1.768(3) . ?
S C16 1.780(2) . ?
O6 C14 1.242(3) . ?
O1 C7 1.315(3) . ?
O1 H1 0.75(3) . ?
O2 C7 1.248(3) . ?
O7 C9 1.353(2) . ?
O7 H8 0.99(3) . ?
O8 C11 1.359(3) . ?
O8 H9 0.781(17) . ?
O4 C4 1.357(2) . ?
O4 H3 0.86(3) . ?
O3 C2 1.351(3) . ?
O3 H2 0.98(3) . ?
O5 C14 1.314(3) . ?
O5 H7 0.86(3) . ?
C7 C1 1.458(3) . ?
C4 C3 1.375(3) . ?
C4 C5 1.399(3) . ?
C8 C13 1.402(3) . ?
C8 C9 1.411(3) . ?
C8 C14 1.456(3) . ?
C13 C12 1.369(3) . ?
C13 H12 0.95 . ?
C12 C11 1.398(3) . ?
C12 H11 0.95 . ?
C2 C3 1.393(3) . ?
C2 C1 1.400(3) . ?
C9 C10 1.384(3) . ?
C1 C6 1.405(3) . ?
C11 C10 1.386(3) . ?
C5 C6 1.370(3) . ?
C5 H5 0.95 . ?
C6 H6 0.95 . ?
C10 H10 0.95 . ?
C3 H4 0.95 . ?
C15 H15A 0.98 . ?
C15 H15B 0.98 . ?
C15 H15C 0.98 . ?
C16 H16A 0.98 . ?
C16 H16B 0.98 . ?
C16 H16C 0.98 . ?
 
loop_
    _geom_angle_atom_site_label_1
    _geom_angle_atom_site_label_2
    _geom_angle_atom_site_label_3
    _geom_angle
    _geom_angle_site_symmetry_1
    _geom_angle_site_symmetry_3
    _geom_angle_publ_flag
O9 S C15 105.70(11) . . ?
O9 S C16 104.79(10) . . ?
C15 S C16 97.97(12) . . ?
C7 O1 H1 111(2) . . ?
C9 O7 H8 110.3(18) . . ?
C11 O8 H9 109(2) . . ?
C4 O4 H3 110(2) . . ?
C2 O3 H2 108.9(19) . . ?
C14 O5 H7 109.8(17) . . ?
O2 C7 O1 122.14(19) . . ?
O2 C7 C1 122.26(19) . . ?
O1 C7 C1 115.6(2) . . ?
O4 C4 C3 121.7(2) . . ?
O4 C4 C5 117.8(2) . . ?
C3 C4 C5 120.50(19) . . ?
C13 C8 C9 117.99(19) . . ?
C13 C8 C14 122.8(2) . . ?
C9 C8 C14 119.2(2) . . ?
C12 C13 C8 121.8(2) . . ?
C12 C13 H12 119.1 . . ?
C8 C13 H12 119.1 . . ?
C13 C12 C11 119.2(2) . . ?
C13 C12 H11 120.4 . . ?
C11 C12 H11 120.4 . . ?
O6 C14 O5 121.72(19) . . ?
O6 C14 C8 122.1(2) . . ?
O5 C14 C8 116.2(2) . . ?
O3 C2 C3 117.06(19) . . ?
O3 C2 C1 122.59(19) . . ?
C3 C2 C1 120.3(2) . . ?
O7 C9 C10 117.05(19) . . ?
O7 C9 C8 122.37(18) . . ?
C10 C9 C8 120.58(19) . . ?
C2 C1 C6 118.31(19) . . ?
C2 C1 C7 120.2(2) . . ?
C6 C1 C7 121.48(19) . . ?
O8 C11 C10 121.8(2) . . ?
O8 C11 C12 117.43(19) . . ?
C10 C11 C12 120.72(19) . . ?
C6 C5 C4 119.5(2) . . ?
C6 C5 H5 120.3 . . ?
C4 C5 H5 120.3 . . ?
C5 C6 C1 121.3(2) . . ?
C5 C6 H6 119.3 . . ?
C1 C6 H6 119.3 . . ?
C9 C10 C11 119.7(2) . . ?
C9 C10 H10 120.1 . . ?
C11 C10 H10 120.1 . . ?
C4 C3 C2 120.0(2) . . ?
C4 C3 H4 120 . . ?
C2 C3 H4 120 . . ?
S C15 H15A 109.5 . . ?
S C15 H15B 109.5 . . ?
H15A C15 H15B 109.5 . . ?
S C15 H15C 109.5 . . ?
H15A C15 H15C 109.5 . . ?
H15B C15 H15C 109.5 . . ?
S C16 H16A 109.5 . . ?
S C16 H16B 109.5 . . ?
H16A C16 H16B 109.5 . . ?
S C16 H16C 109.5 . . ?
H16A C16 H16C 109.5 . . ?
H16B C16 H16C 109.5 . . ?
 
loop_
    _geom_torsion_atom_site_label_1
    _geom_torsion_atom_site_label_2
    _geom_torsion_atom_site_label_3
    _geom_torsion_atom_site_label_4
    _geom_torsion
    _geom_torsion_site_symmetry_1
    _geom_torsion_site_symmetry_2
    _geom_torsion_site_symmetry_3
    _geom_torsion_site_symmetry_4
    _geom_torsion_publ_flag
C9 C8 C13 C12 0.1(3) . . . . ?
C14 C8 C13 C12 177.54(19) . . . . ?
C8 C13 C12 C11 0.8(3) . . . . ?
C13 C8 C14 O6 -174.7(2) . . . . ?
C9 C8 C14 O6 2.8(3) . . . . ?
C13 C8 C14 O5 5.1(3) . . . . ?
C9 C8 C14 O5 -177.40(19) . . . . ?
C13 C8 C9 O7 178.35(19) . . . . ?
C14 C8 C9 O7 0.8(3) . . . . ?
C13 C8 C9 C10 -1.2(3) . . . . ?
C14 C8 C9 C10 -178.79(19) . . . . ?
O3 C2 C1 C6 -179.76(18) . . . . ?
C3 C2 C1 C6 0.6(3) . . . . ?
O3 C2 C1 C7 -1.3(3) . . . . ?
C3 C2 C1 C7 179.03(19) . . . . ?
O2 C7 C1 C2 -3.4(3) . . . . ?
O1 C7 C1 C2 177.63(19) . . . . ?
O2 C7 C1 C6 174.99(19) . . . . ?
O1 C7 C1 C6 -4.0(3) . . . . ?
C13 C12 C11 O8 -179.83(19) . . . . ?
C13 C12 C11 C10 -0.6(3) . . . . ?
O4 C4 C5 C6 -178.36(19) . . . . ?
C3 C4 C5 C6 1.8(3) . . . . ?
C4 C5 C6 C1 -1.2(3) . . . . ?
C2 C1 C6 C5 0.0(3) . . . . ?
C7 C1 C6 C5 -178.4(2) . . . . ?
O7 C9 C10 C11 -178.13(18) . . . . ?
C8 C9 C10 C11 1.5(3) . . . . ?
O8 C11 C10 C9 178.65(19) . . . . ?
C12 C11 C10 C9 -0.5(3) . . . . ?
O4 C4 C3 C2 178.93(19) . . . . ?
C5 C4 C3 C2 -1.2(3) . . . . ?
O3 C2 C3 C4 -179.64(19) . . . . ?
C1 C2 C3 C4 0.0(3) . . . . ?
 
